# Supplementary material for: Free Fatty Acid Species Differentially Modulate the Inflammatory Gene Response in Primary Human Skeletal Myoblasts
Source: MDPI journal article supplement (doi:10.3390/biology10121318), 2021-12-12

[illegible]

cagacattccattcgccttgcggaataacacatggtagatagcagcatatatacgtatataatatacgaactcaatttc  
caggacacatgattgattatgtcattgcagctacgaattgtgtgtgtttctttcttccatcttaaaattccaagat  
tgacattgtcttggtgacaggattctctgcatgatttttcccaataaaagctcagatggaagaacctatgacgat  
atatactgattcccaaaagctgtgggaagggtctacagctcagctgattattttgtttaaagtcttgcagggctc  
tcttggaaaacagcttgagataagctgttcattttggaaggagctgactcgttgggaagaacatttgaggtctataa  
tgaanaacgtaaa gaaagacagagacgattatcttgatcagaanaaacatcaggtctcagctgtcgttgcttgcat  
acctcagtgagagagacgacatctttggagaacttcttcgtttatcttccatacaacccaggcagaag  
tagtttccgaagacgaatttttttaccagctgtaaactcagtttccagaagaaggagcttcacgaggtaccaa  
gtgttgatctcttctgttccacaggagggaagacatctaaaagacgaactcagggaaattgctacattctta  
gtcttctctcttgcatgaccactctgtctgttatacttgatttactgttcttgggaacagctccctagt  
ggctctctctgtcgaatgctcttgcagcccaacatgaacatctctccatgatgcgtctcttctgtatcccc  
ctctctgtaaaacactccaggggctcactctgtttaggagtaggaacccatgcttccacagctctgcatctccag  
gaagaatgactgatttctgtagaagtcagcgactctgaagatgctttattcaagacacaaattccaactctaaagt  
tcttgatttccaaaattgtgtttagattttatgaaaactctctacttcatctatttccctgaggaacaact  
actgtatattgtttacttataaaattgaagctttatattatctcagattgcaggacacacacacagatttgaag  
tcttgatgaacatggagaggactgtgttttattctctgttataatgggttggaacccaactttttgga  
taataatttctcttaacaaaacacatgattgaatgctctgactcttccactcgttctctctggccc  
gctgttctctctggaagacagctgtctgttggagctgtcttccacacagagcgccatcattgttgcacacag  
actacaacggaagccctgagtagaggagatctcagctctgaaagcctatgaattgttccaaattttatttcgag

ntcaccgtcaccacagcctgtggagcaagacagctggcctgtgtgaattaccagatctctgtcaagggcagtaactctgtca  
gttggaaagtcgctctttggatgcagaaaaacaagctgcgtgggaatgggacgtgggaccgggccaactaaaggtccag  
gtctgacgtctgcctgcctactgatgcagaacccctgcctatctgtattctgttggtgacgtgactgcacag  
acgtcaactggggcctgtctgtaattctacacactcctctggggatccgcactgtgctctaccaaggccaggtctct  
catcaatgggaacctttctattcctacgggtgcaacaagcatgaggatgcgacatccgggaagggctctgactggc  
cctcgtgttgaaagctcaacctctcctcgtgtgtgtgcacacgtctctgaccacagacatccctatgcagag  
gaagtgcacagatgtgtgacccttatgggaattgtggtcatcgatagtggtccggcctgggcctggcgtccgcagtt  
(GAPDH):  
ggaaagtgaaagtcggagtaacggattggctgtattgggcgcctgtgaccagggtcgttttaactctggtaaagtg  
gatatttggcatcaatgacctctcattgacccaactacagtggttcaattgcatattgaccacattggca  
attcttcaggccactcgaagtgtgagaaagggtaagctctgtcatcaattgaaatcccatcacctctccaggagcagatc  
cctccaaatcaagttggggcgtatcgtggcctgagtacgtctgtggagtcacatggcgtcttaccacacgtggagaaggt  
ggggctcattgagggggagacaaagggtatcatcagatctgtgtgctgtgaccccatctgctatcgttggtgt  
gaacctgtgaagttatgacacagcctcaagatcatcagaatcgtcctctgcacacccaactgctatgcacctctggcca  
aggtcatctatgacaacttggatctgtggaaggactatgaccacgtcatgccatcactgccaccagaagactgtg  
gatgcgccctcgggaactctgggcgtatggccgcggggctctcagaacatcatctcgtctctatcactctgccaa  
aacca

Figure S1: Gene sequences are shown. Sequences of capture extenders (blue), label extenders (red), blocking probes (green) and flanking sequences (black) are indicated.

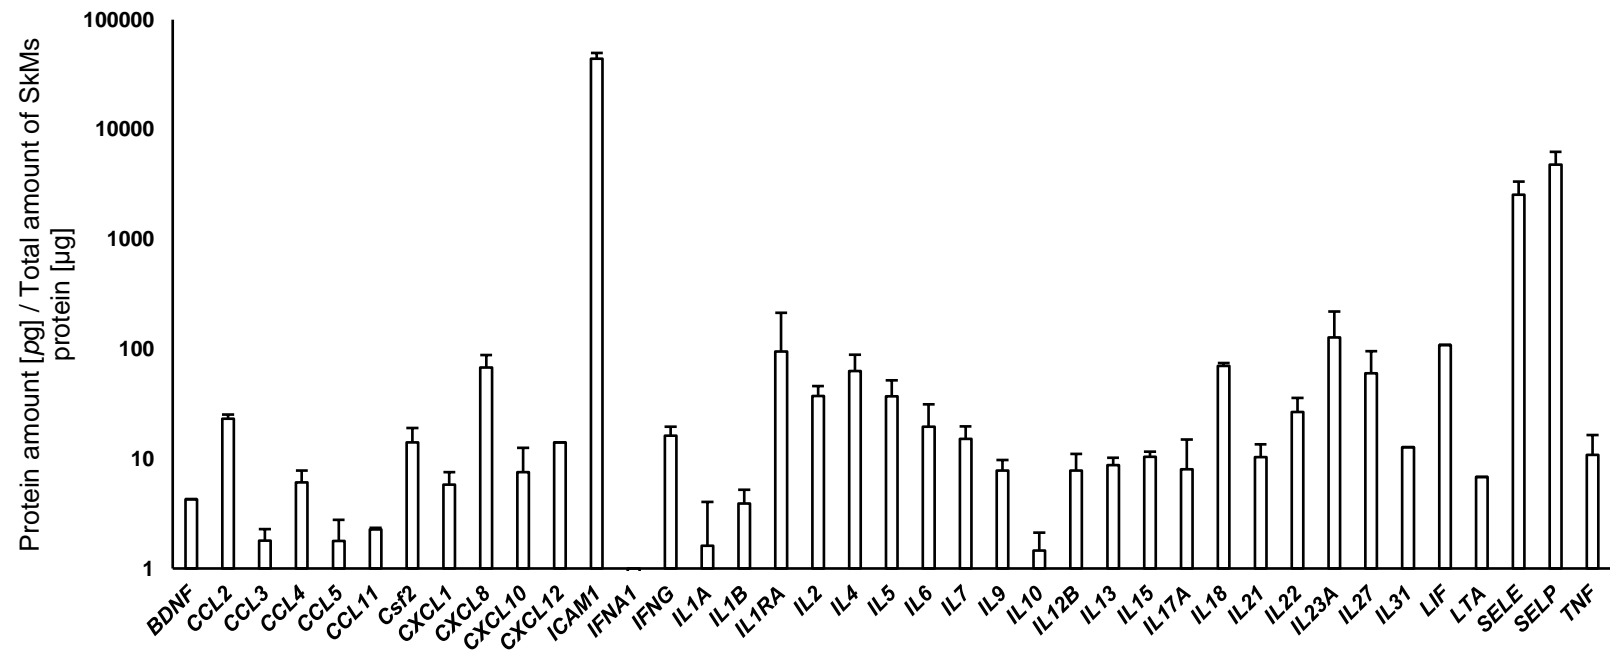

Figure S2: Constitutive expression of proteins in untreated SkMs. SkM cell extracts were subjected to multiplex protein quantification three times to precisely determine the concentration of inflammatory markers in total cellular proteins. The results are presented as the mean  $\pm$  SD from three independent experiments.

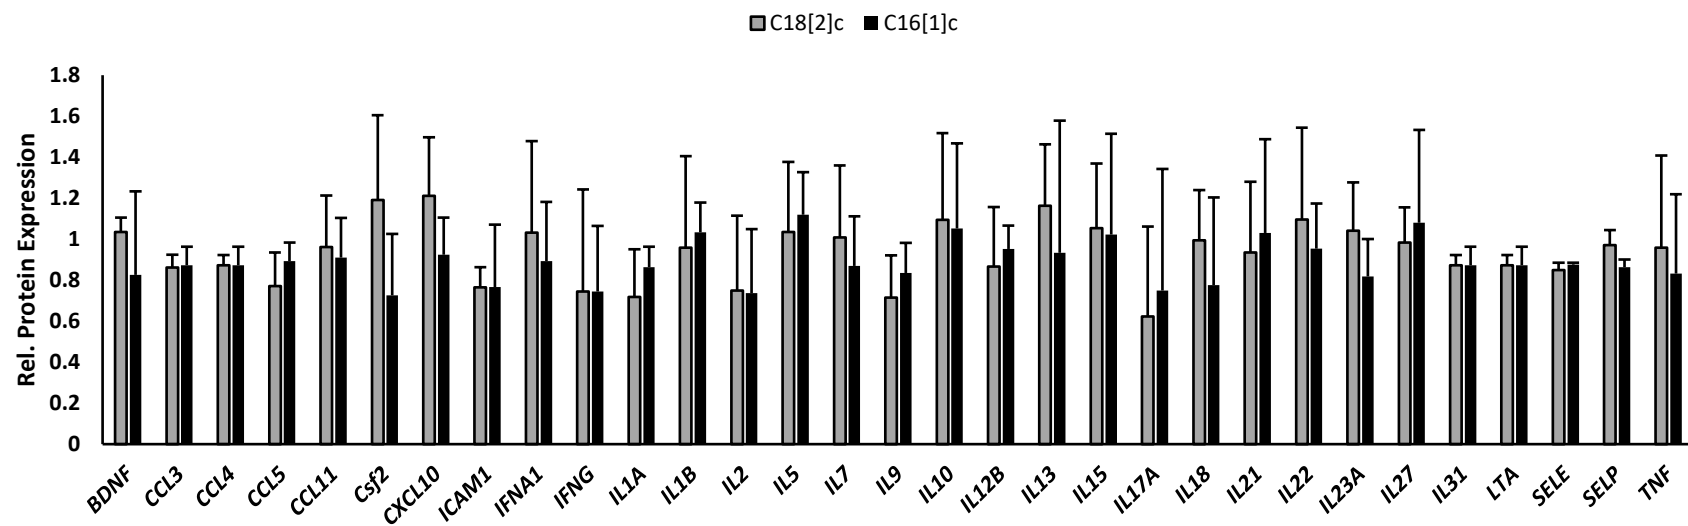

Figure S3: CC18[2]c and C16[1]c mediated relative protein expression in SkMs. The experiments and data analysis were performed as described in the legend to Fig. 1a-h.

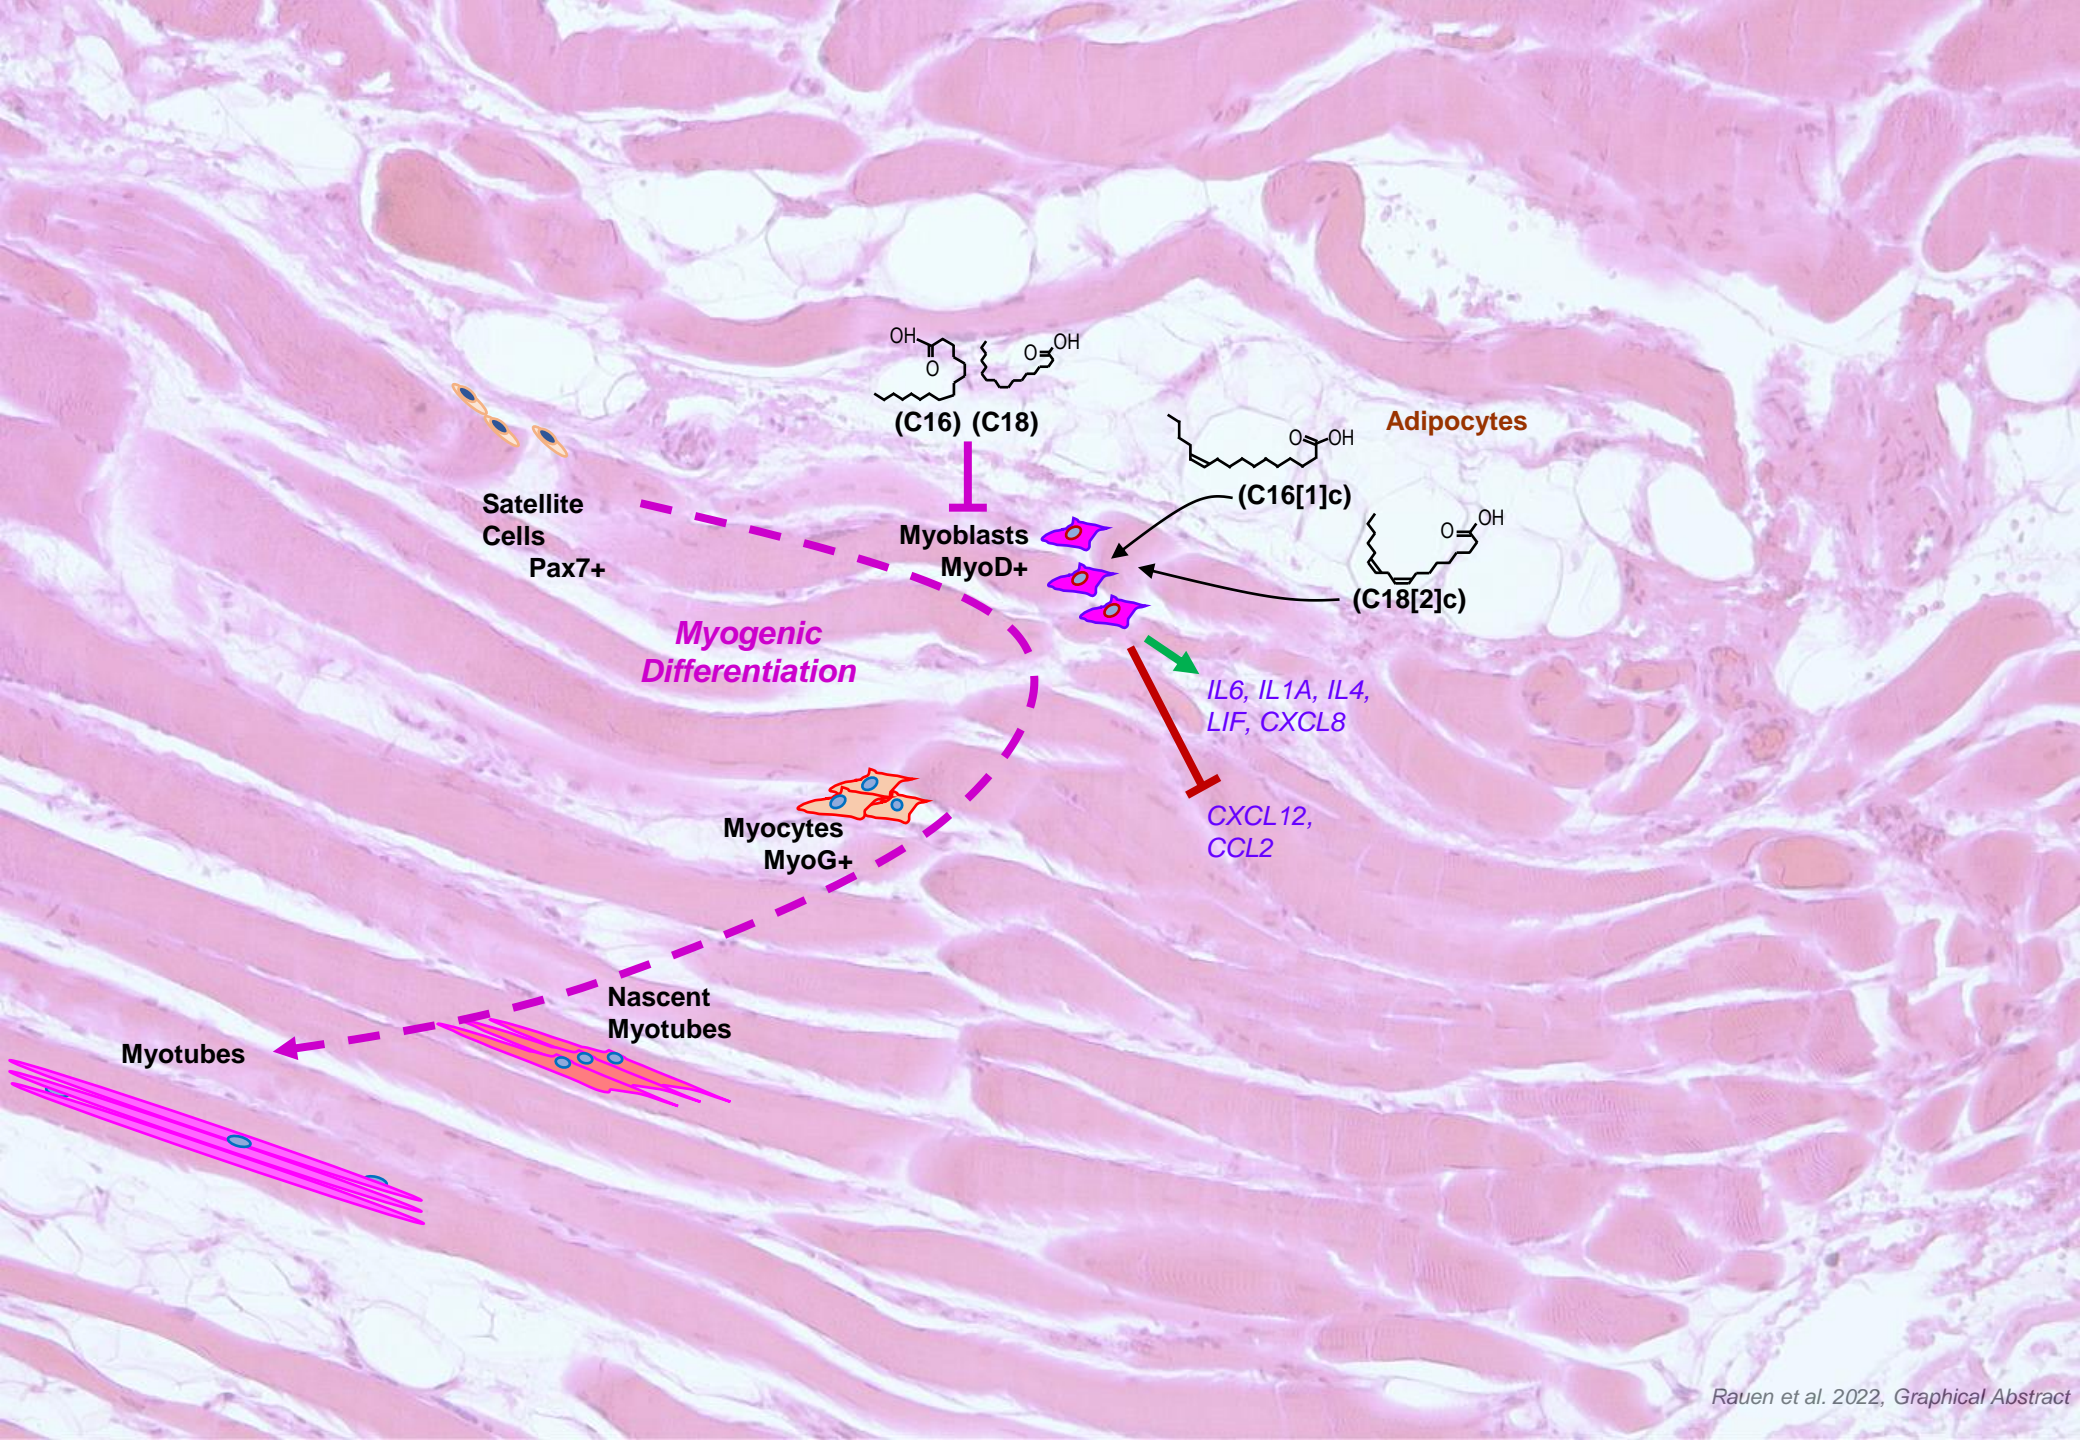

Supplement: s1 [file s1]
